# Supplementary material for: Melt viscosity behavior of C60 containing star polystyrene composites
Source: Royal Society of Chemistry journal article supplement (doi:10.1039/c3sm00103b), 2013-01-01
Supplement: c3sm00103b.pdf [file c3sm00103b.pdf]

## Supporting Information

# Melt Viscosity Behavior of C<sub>60</sub> Containing Star Polystyrene composites

*Haiying Tan,<sup>a,b</sup> Donghua Xu,<sup>a</sup> Dong Wan,<sup>a,b</sup> Yujie Wang,<sup>a,b</sup> Lu Wang,<sup>a,b</sup> Jun Zheng,<sup>a,b</sup> Feng Liu,<sup>a,b</sup>*

*Li Ma,<sup>a</sup> and Tao Tang <sup>\*a</sup>*

<sup>a</sup> *State Key Laboratory of Polymer Physics and Chemistry, Changchun Institute of Applied Chemistry,*

*Chinese Academy of Sciences, Changchun 130022, China*

<sup>b</sup> *Graduate School of the Chinese Academy of Sciences, Beijing 100039, China*

\* To whom correspondence should be addressed.

Tel: +86 (0) 431 85262004

Fax: +86 (0) 431 85262827

E-mail: [ttang@ciac.jl.cn](mailto:ttang@ciac.jl.cn)

## Table of Content

| Figure or Table | Page Number | Content                                                                                                                             |
|-----------------|-------------|-------------------------------------------------------------------------------------------------------------------------------------|
|                 | 3           | Continuous Relaxation Spectra                                                                                                       |
| Table S1        | 3           | Summary of $\eta_{0.05}^*$ , $G_N^0$ , $\eta_a$ and $T_g$ for LPS-22k, LPS-212k and their blends with $C_{60}$ .                    |
| Table S2        | 4           | Summary of $\eta_0$ , $G_N^0$ , $\eta_a$ and $\tau_a$ for pure SPSs and their blends with $C_{60}$ .                                |
| Figure S1       | 4           | $^1\text{H}$ NMR spectra of the synthesized polystyrene                                                                             |
| Figure S2       | 5           | TEM images of S3PS-48k-5 and S3PS-119k-5                                                                                            |
| Figure S3       | 5           | SAXS profiles of S3PS-75k-1 composites before and after rheology                                                                    |
| Figure S4       | 6           | The changing trend of $G'$ and $G''$ of S3PS-48k/ $C_{60}$ composites                                                               |
| Figure S5       | 7           | The changing trend of $\eta^*$ , $G'$ and $G''$ of S3PS-75k/ $C_{60}$ composites                                                    |
| Figure S6       | 8           | The changing trend of $G'$ and $G''$ of S3PS-119k/ $C_{60}$ composites                                                              |
| Figure S7       | 9           | The changing trend of $\eta^*$ , $G'$ and $G''$ of S3PS-150k/ $C_{60}$ composites                                                   |
| Figure S8       | 10          | The changing trend of $G'$ and $G''$ of S6PS-93k/ $C_{60}$ composites                                                               |
| Figure S9       | 11          | The changing trend of $\eta^*$ , $G'$ and $G''$ of S6PS-226k/ $C_{60}$ composites                                                   |
| Figure S10      | 12          | The changing trend of $G'$ and $G''$ of LPS/ $C_{60}$ composites                                                                    |
| Figure S11      | 13          | $\eta_0$ , $\eta_a$ , $\eta_{0.05}^*$ , $\tau_a$ and $G_N^0$ of S3PS-48k/ $C_{60}$ composites versus the concentration of $C_{60}$  |
| Figure S12      | 14          | $\eta_0$ , $\eta_a$ , $\eta_{0.05}^*$ , $\tau_a$ and $G_N^0$ of S3PS-75k/ $C_{60}$ composites versus the concentration of $C_{60}$  |
| Figure S13      | 15          | $\eta_0$ , $\eta_a$ , $\eta_{0.05}^*$ , $\tau_a$ and $G_N^0$ of S6PS-93k/ $C_{60}$ composites versus the concentration of $C_{60}$  |
| Figure S14      | 16          | $\eta_0$ , $\eta_a$ , $\eta_{0.05}^*$ , $\tau_a$ and $G_N^0$ of S3PS-119k/ $C_{60}$ composites versus the concentration of $C_{60}$ |
| Figure S15      | 17          | $\eta_0$ , $\eta_a$ , $\eta_{0.05}^*$ , $\tau_a$ and $G_N^0$ of S3PS-150k/ $C_{60}$ composites versus the concentration of $C_{60}$ |
| Figure S16      | 18          | $\eta_0$ , $\eta_a$ , $\eta_{0.05}^*$ , $\tau_a$ and $G_N^0$ of S6PS-226k/ $C_{60}$ composites versus the concentration of $C_{60}$ |
| Figure S17      | 19          | Master curve of S3PS-48/150k blend at 150 °C.                                                                                       |
| Figure S18      | 19          | The changing trend of $\eta^*$ , $G'$ and $G''$ of S3PS-48/S3PS-150k blends                                                         |
| Figure S19      | 19          | Comparison of $\eta^*$ , $G'$ and $G''$ obtained at different gaps.                                                                 |
| Figure S20      | 20          | Elution curves of S3PS-48k from SEC measurement                                                                                     |

Figure S21 20 Figure showed how the zero shear viscosity determined.

### Continuous Relaxation Spectra.

The TRIOS software available with the ARES-G2 rheometer was used to evaluate the continuous relaxation spectra, using both the  $G'$  (storage modulus) and  $G''$  (loss modulus) data. The continuous relaxation time spectrum can be extracted by fitting following model with  $n$  terms to either oscillation ( $G'(w)$ ,  $G''(w)$ ) or Relaxation ( $G(t)$ ) data.

$$d \ln \tau = \frac{d\tau}{\tau}, g(\tau)\tau = H(\ln \tau)$$

$$G(t) = G_e + \int_{-\infty}^{+\infty} H(\ln \tau) e^{-t/\tau} d \ln \tau$$

$$G' = \int_{-\infty}^{+\infty} H(\ln \tau) \frac{\omega^2 \tau^2}{1 + \omega^2 \tau^2} d \ln \tau$$

$$G'' = \int_{-\infty}^{+\infty} H(\ln \tau) \frac{\omega \tau}{1 + \omega^2 \tau^2} d \ln \tau$$

For the numerical computation the spectrum  $H(\ln\tau)$  is discretized (typical in the order of 100 steps). The spectrum represents all the pairs of fitted  $\{H_i, \tau_i\}$  parameters and can be extracted into a new file if desired.

**Table S1.** Zero shear viscosity ( $\eta_0$ ), plateau modulus ( $G_N^0$ ), apparent relaxation time ( $\tau_a$ ) and glass transition temperature ( $T_g$ ) for LPS-22k, LPS-212k and their blends with C<sub>60</sub>.

| Sample          | $\tau_a$ (s) | $T_g$ (°C) | $G_N^0$ (Pa) | $\eta_{0.05}^*$ (Pa*s) |
|-----------------|--------------|------------|--------------|------------------------|
| <b>LPS-22k</b>  | 0.177        | 103.80     | 175121       | 35264                  |
| LPS-22k-1       | 0.191        | 103.60     | 172178       | 39275                  |
| <b>LPS-212k</b> | 18.743       | 105.20     | 142804       | 930844                 |
| LPS-212k-1      | 18.554       | 104.90     | 123549       | 818497                 |

(Zero shear viscosity was determined from the complex viscosity at the low frequency (0.05 rad/s) at the measured regime.)

**Table S2** Zero shear viscosity ( $\eta_0$ ), plateau modulus ( $G_N^0$ ), apparent viscosity ( $\eta_a$ ) and apparent relaxation time ( $\tau_a$ ) for pure SPSs and their blends with  $C_{60}$ .

| Sample      | $\tau_a$ (s) | $G_N^0$ (Pa) | $\eta_0$ (Pa · s) <sup>a</sup> × 10 <sup>3</sup> | $\eta_a$ (Pa · s) |
|-------------|--------------|--------------|--------------------------------------------------|-------------------|
| S3PS-48k    | 0.045        | 223273       | 35.5±3.8                                         | 10047.3           |
| S3PS-48k-1  | 0.035        | 202237       | 15.7±1.3                                         | 7078.3            |
| S3PS-48k-5  | 0.062        | 220234       | 36.0±3.2                                         | 13654.5           |
| S3PS-75k    | 0.242        | 171028       | 55.9±3.7                                         | 41388.8           |
| S3PS-75k-1  | 0.191        | 164881       | 41.5±2.9                                         | 31492.2           |
| S3PS-75k-5  | 0.215        | 191593       | 52.1±2.6                                         | 41192.5           |
| S3PS-119k   | 0.842        | 145707       | 129.9±4.5                                        | 122685.3          |
| S3PS-119k-1 | 0.944        | 158969       | 144.5±3.9                                        | 150066.7          |
| S3PS-119k-2 | 1.052        | 164481       | 160.9±6.5                                        | 173034.0          |
| S3PS-119k-5 | 1.996        | 161162       | 240.1±6.2                                        | 321679.4          |
| S3PS-150k   | 1.248        | 148312       | 166.5±3.4                                        | 185093.4          |
| S3PS-150k-1 | 2.182        | 157131       | 260.7±5.2                                        | 342859.8          |
| S3PS-150k-2 | 2.863        | 142146       | 290.5±6.3                                        | 406964.0          |
| S3PS-150k-5 | 2.591        | 154389       | 296.4±5.8                                        | 400021.9          |
| S6PS-93k    | 0.070        | 209537       | 40.6±2.5                                         | 14667.6           |
| S6PS-93k-1  | 0.057        | 200107       | 27.9±1.1                                         | 11406.1           |
| S6PS-93k-5  | 0.078        | 278548       | 45.0±2.2                                         | 21726.7           |
| S6PS-226k   | 1.338        | 157244       | 182.8±3.8                                        | 210392.5          |
| S6PS-226k-1 | 1.448        | 150599       | 191.3±1.6                                        | 218067.4          |
| S6PS-226k-5 | 1.459        | 151645       | 199.2±2.2                                        | 221250.1          |

<sup>a</sup> Steady shear rheology was performed at the shear rate from  $10^{-3}$  to  $10$  s<sup>-1</sup>. Zero shear viscosity ( $\eta_0$ ) was determined from the steady shear viscosity at the low shear rate, as shown in Figure S19

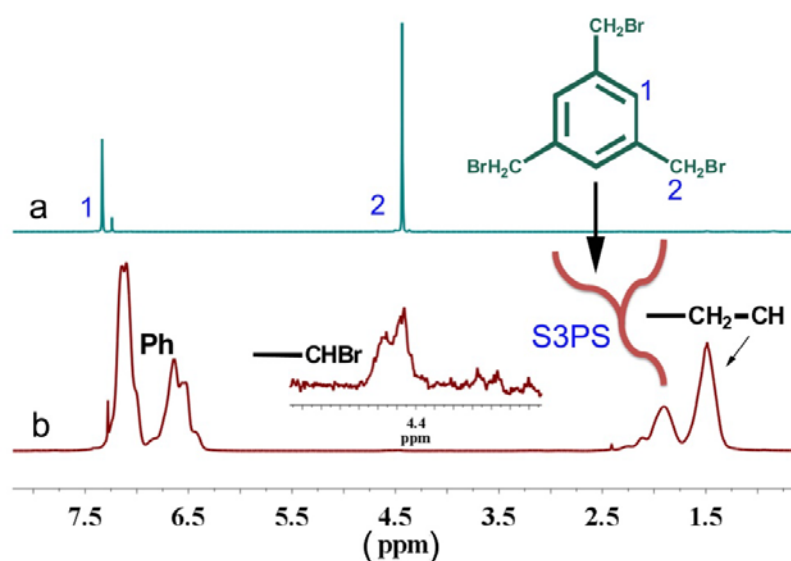

**Figure S1.** <sup>1</sup>H NMR spectra of (a) ATRP initiator and (b) S3PS.

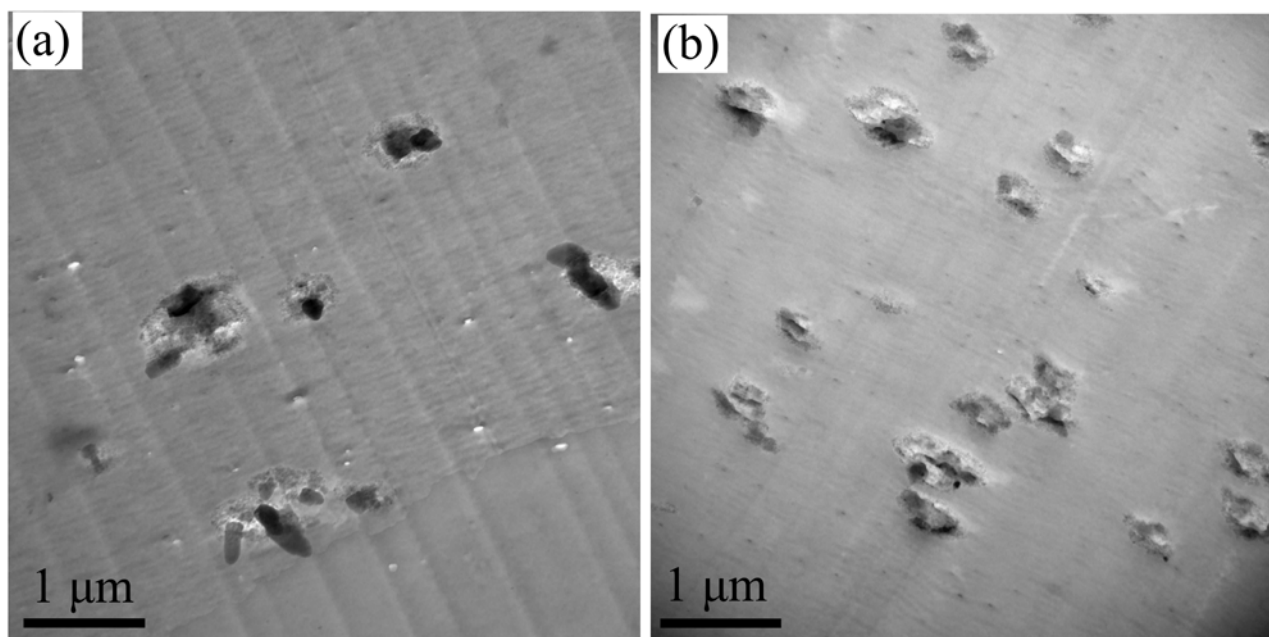

**Figure S2.** TEM images of (a) S3PS-48k with 5 wt% C<sub>60</sub> (S3PS-48k-5) and (b) S3PS-119k with 5 wt% C<sub>60</sub> (S3PS-119k-5)

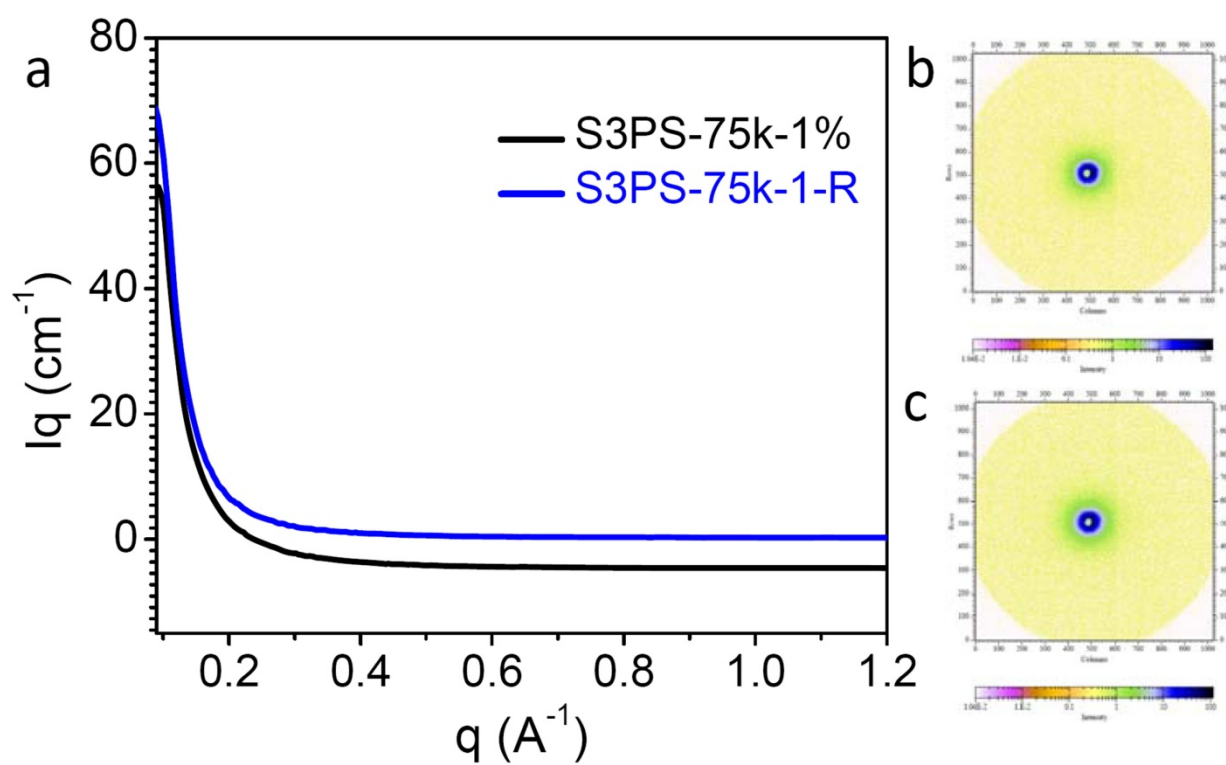

**Figure S3.** (a) SAXS results of S3PS-75k-1 before and after rheological measurements; (b) 2D SAXS image of S3PS-75k-1 before rheological measurements; (c) 2D SAXS image of S3PS-75k-1 after rheological measurements. The symbol 'R' represents the sample suffering rheological test.

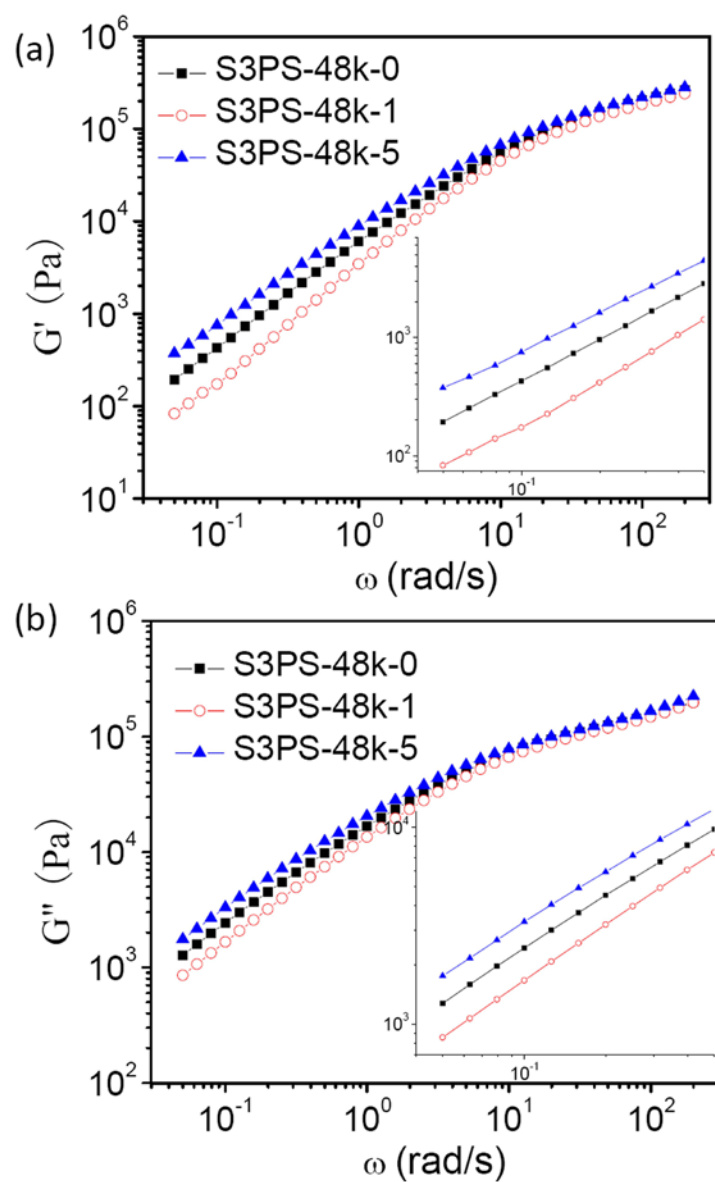

**Figure S4.** Storage modulus ( $G'$ ) (a) and loss modulus ( $G''$ ) (b) versus frequency ( $\omega$ ) for S3PS-48k with different content of  $C_{60}$ . (Testing temperature: 150 °C).

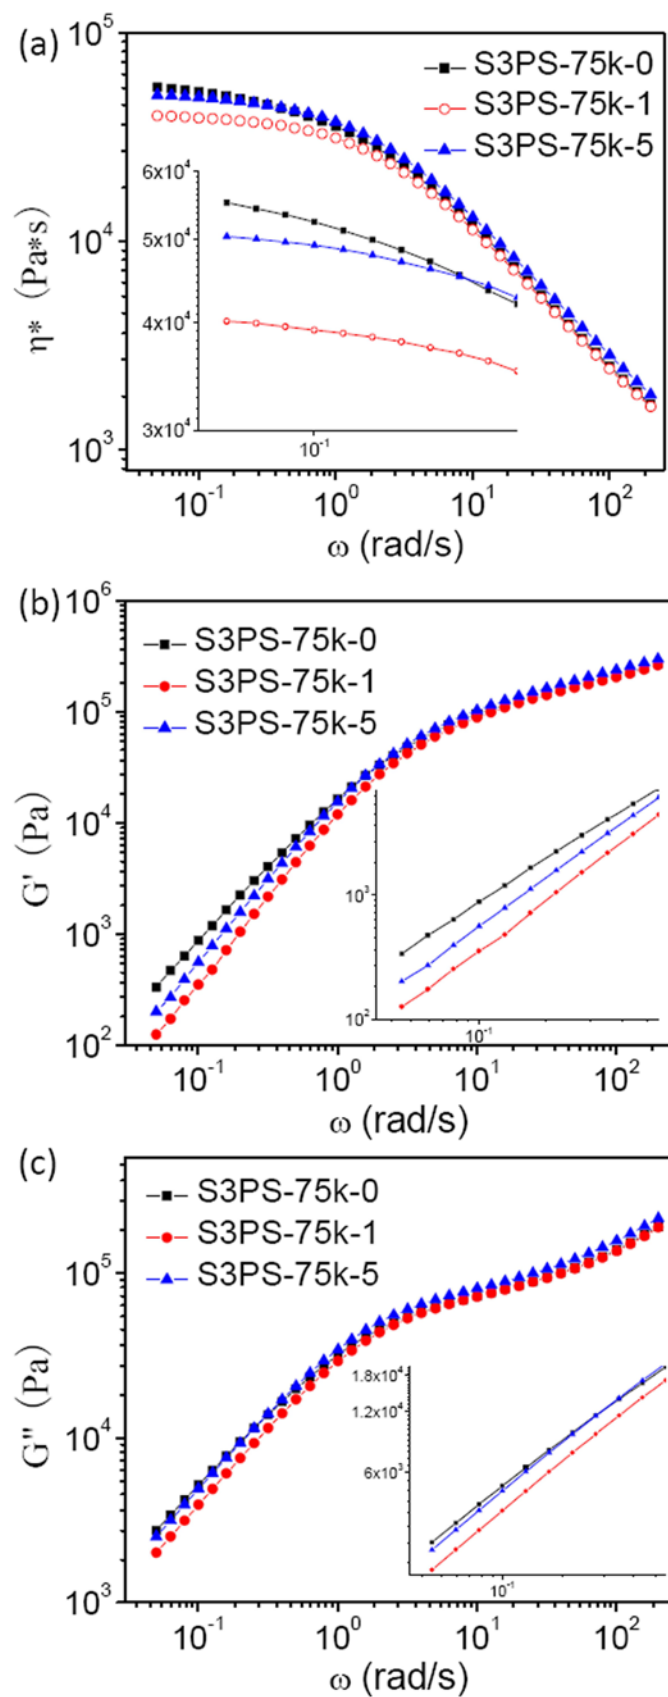

**Figure S5.** Complex viscosity ( $\eta^*$ ) (a), storage modulus ( $G'$ ) (b) and loss modulus ( $G''$ ) (c) versus frequency ( $\omega$ ) for S3PS-75k with different content of  $C_{60}$ . (Testing temperature: 150 °C).

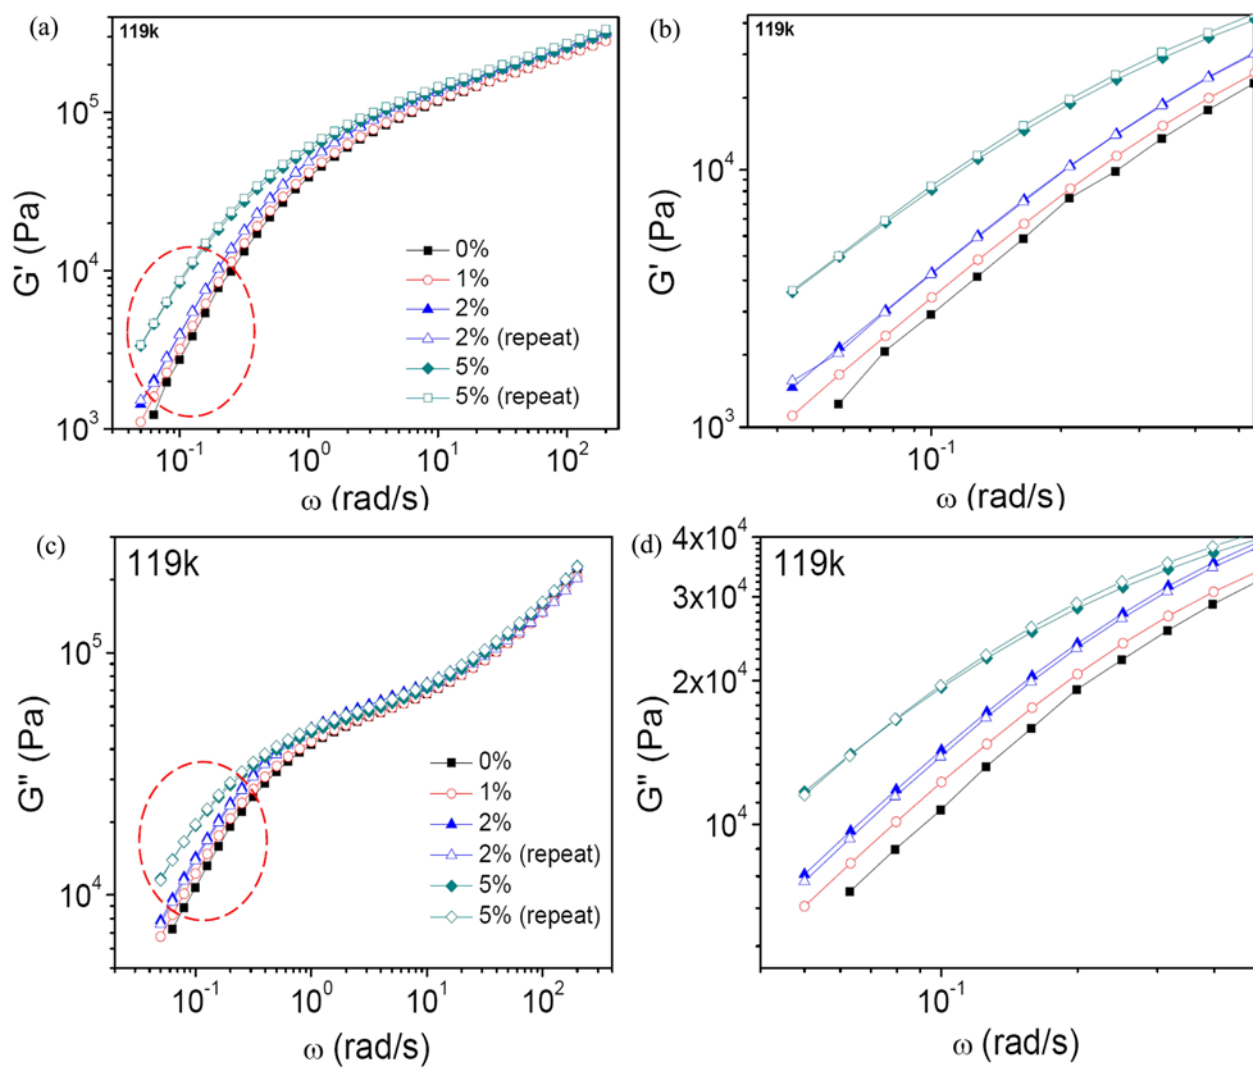

**Figure S6.** Storage modulus ( $G'$ ) (a) and loss modulus ( $G''$ ) (b) versus frequency ( $\omega$ ) for S3PS-119k with different content of C<sub>60</sub>. (Testing temperature: 150 °C). The symbol “repeat” in the figure represent the data of the samples were measured repeatedly. (b) and (d) were the zoom in of (a) and (b), respectively.



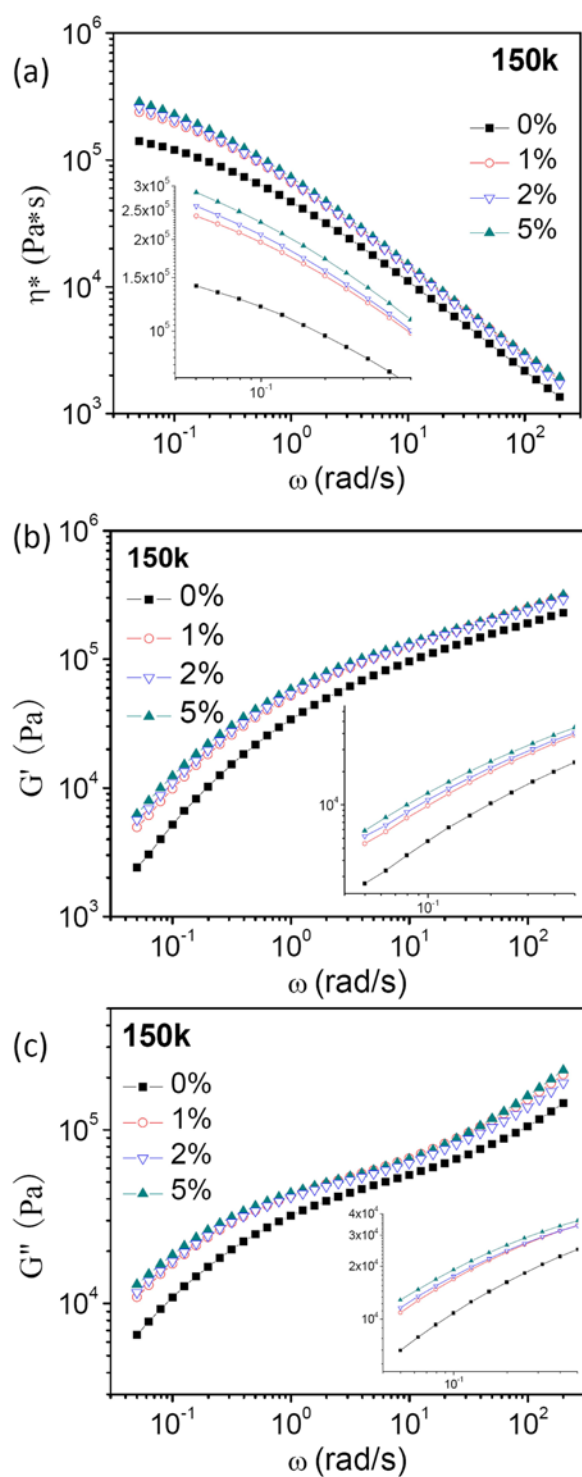

**Figure S7.** Complex viscosity ( $\eta^*$ ) (a), storage modulus ( $G'$ ) (b) and loss modulus ( $G''$ ) (c) versus frequency ( $\omega$ ) for S3PS-150k with different content of C<sub>60</sub>. (Testing temperature: 150 °C).

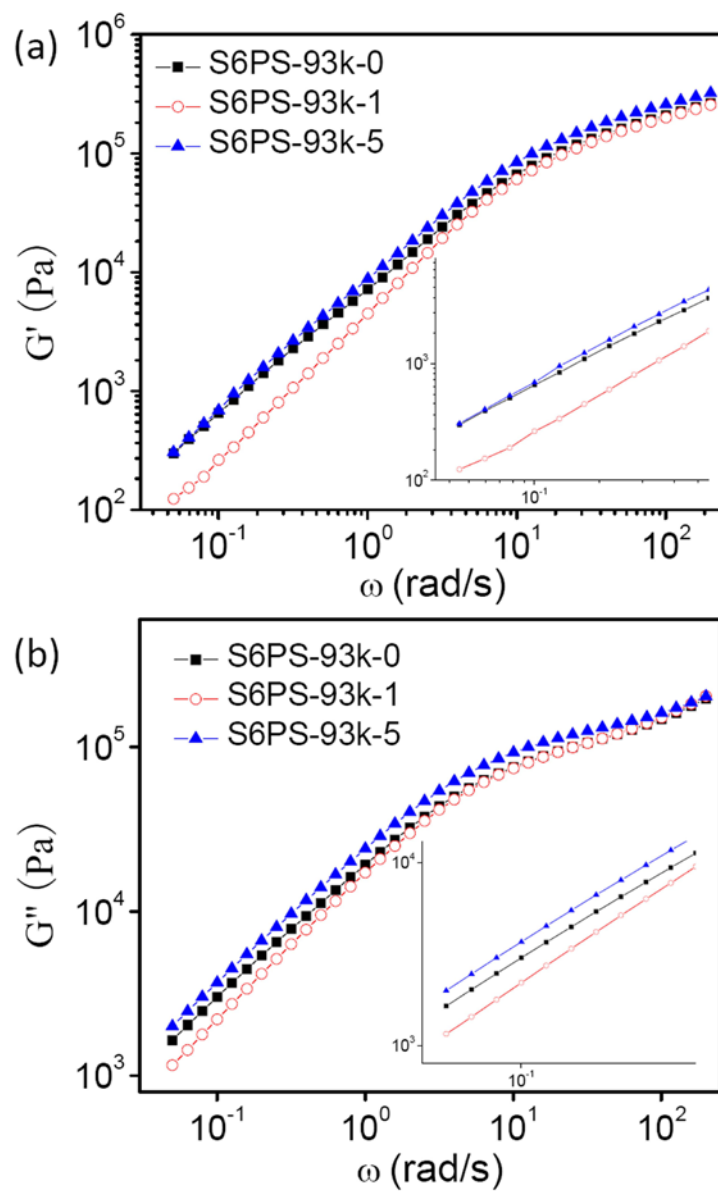

**Figure S8.** Storage ( $G'$ ) and loss ( $G''$ ) moduli versus frequency ( $\omega$ ) for S6PS with different content of  $C_{60}$  for S6PS-93k (Testing temperature: 150 °C).

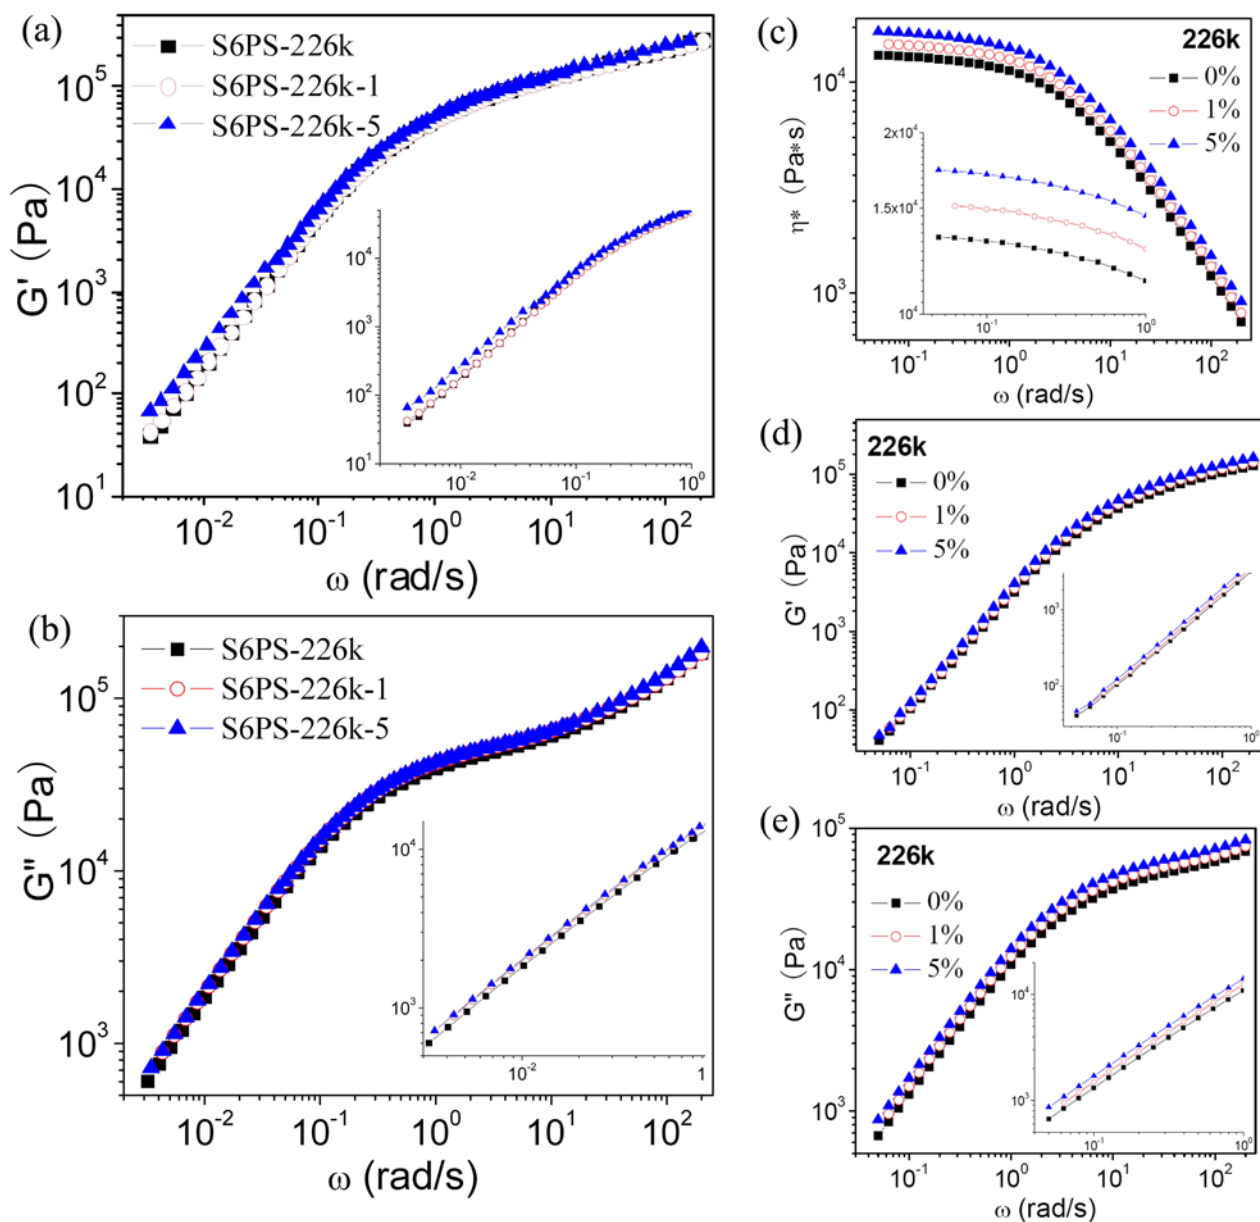

**Figure S9.** Complex viscosity ( $\eta^*$ ) (at 170 °C), storage ( $G'$ ) and loss ( $G''$ ) moduli versus frequency ( $\omega$ ) for S6PS with different content of C<sub>60</sub> for S6PS-226k. The data on the left side (a and b) and on the right side (c, d and e) was measured at 150 °C and 170 °C, respectively.

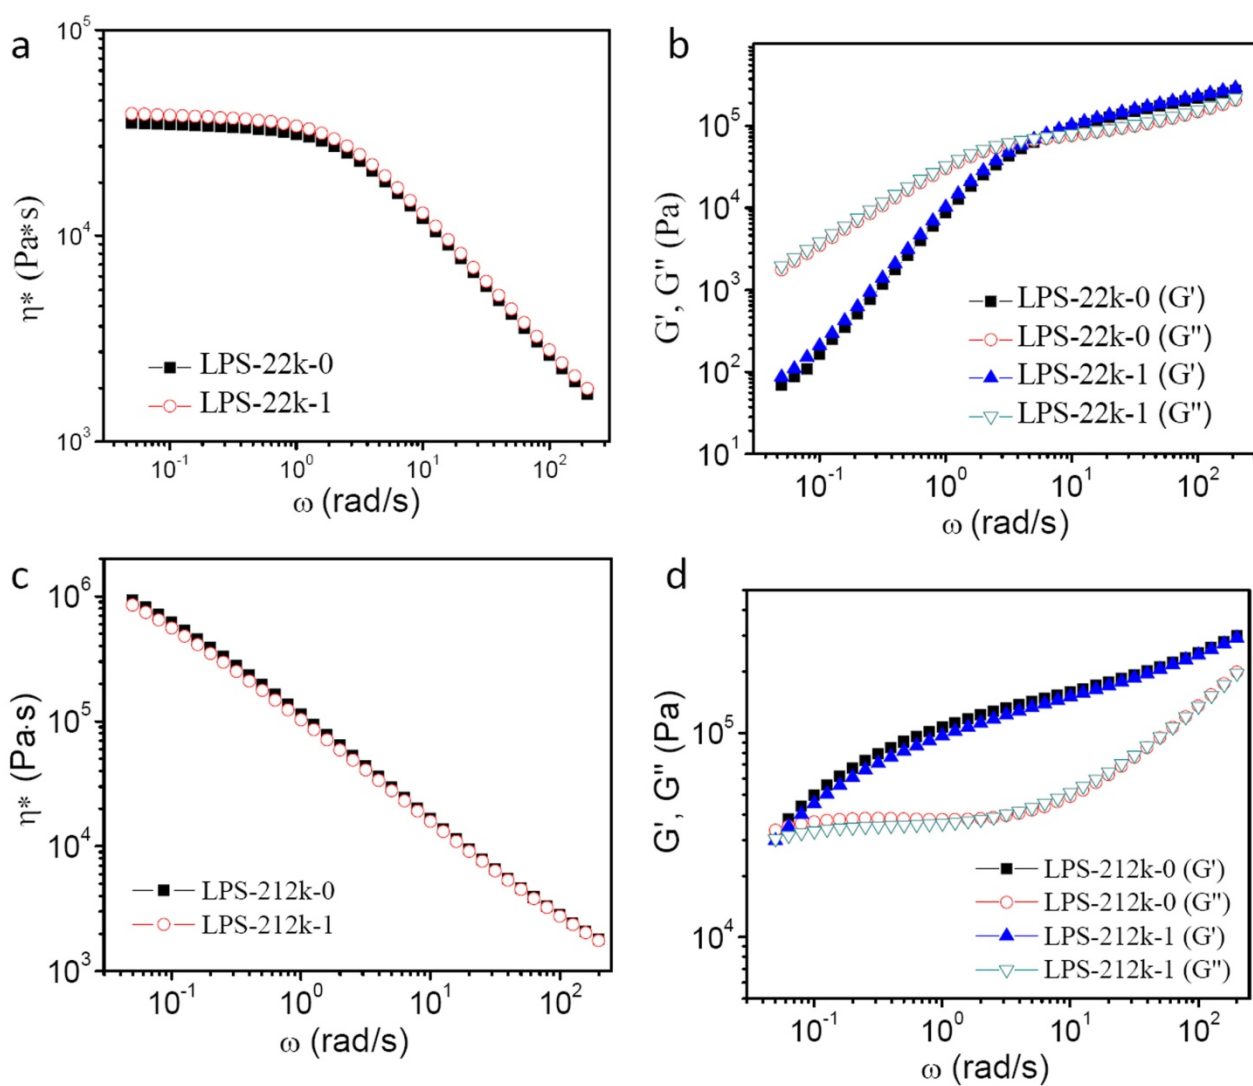

**Figure S10.** Complex viscosity ( $\eta^*$ ), storage ( $G'$ ) and loss ( $G''$ ) moduli versus frequency ( $\omega$ ) for LPS with different content of  $C_{60}$ . (a) and (b) for LPS-22k (unentangled), and (c) and (d) for LPS-212k (entangled) (b) (Testing temperature: 150 °C).

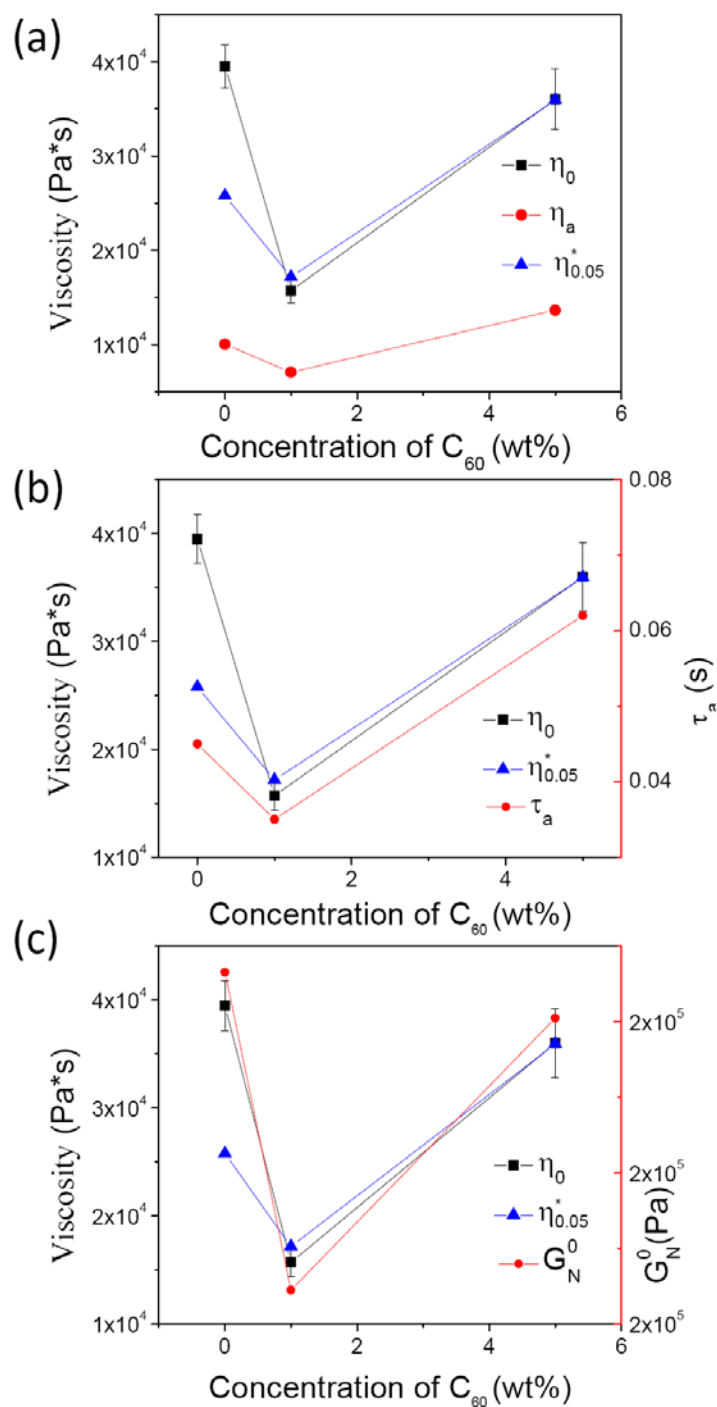

**Figure S11.** (a) Zero shear viscosity ( $\eta_0$ ), complex viscosity at 0.05 rad/s ( $\eta_{0.05}^*$ ) and apparent viscosity ( $\eta_a = G_N^0 \cdot \tau_a$ ) of S3PS-48k/C<sub>60</sub> composites versus the concentration of C<sub>60</sub>; (b)  $\eta_0$ ,  $\eta_{0.05}^*$  and apparent relaxation time ( $\tau_a$ ) of S3PS-48k/C<sub>60</sub> composites versus the concentration of C<sub>60</sub>; (c)  $\eta_0$ ,  $\eta_{0.05}^*$  and plateau modulus ( $G_N^0$ ) of S3PS-48k/C<sub>60</sub> composites versus the concentration of C<sub>60</sub> (Testing temperature: 150 °C).

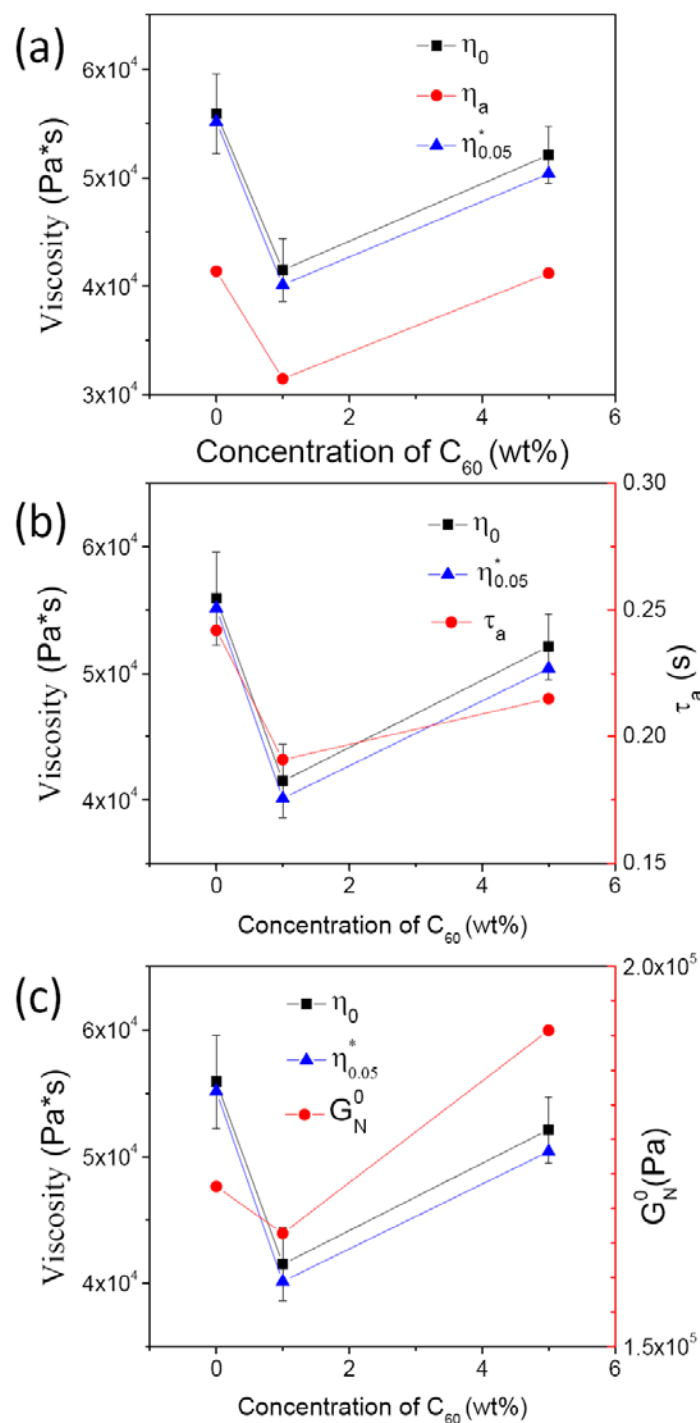

**Figure S12.** (a) Zero shear viscosity ( $\eta_0$ ), complex viscosity at 0.05 rad/s ( $\eta_{0.05}^*$ ) and apparent viscosity ( $\eta_a = G_N^0 \cdot \tau_a$ ) of S3PS-75k/C<sub>60</sub> composites versus the concentration of C<sub>60</sub>; (b)  $\eta_0$ ,  $\eta_{0.05}^*$  and apparent relaxation time ( $\tau_a$ ) of S3PS-75k/C<sub>60</sub> composites versus the concentration of C<sub>60</sub>; (c)  $\eta_0$ ,  $\eta_{0.05}^*$  and plateau modulus ( $G_N^0$ ) of S3PS-75k/C<sub>60</sub> composites versus the concentration of C<sub>60</sub> (Testing temperature: 150 °C).

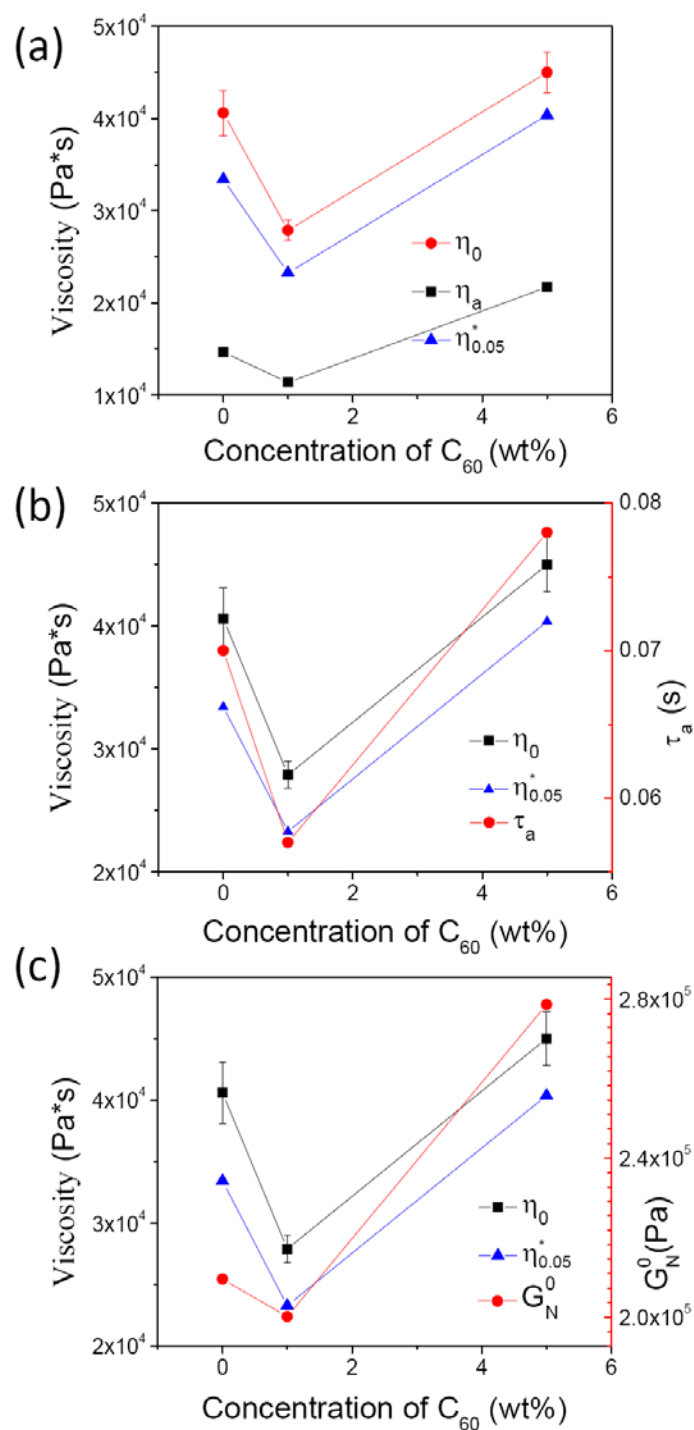

**Figure S13.** (a) Zero shear viscosity ( $\eta_0$ ), complex viscosity at 0.05 rad/s ( $\eta_{0.05}^*$ ) and apparent viscosity ( $\eta_a = G_N^0 \cdot \tau_a$ ) of S6PS-93k/C<sub>60</sub> composites versus the concentration of C<sub>60</sub>; (b)  $\eta_0$ ,  $\eta_{0.05}^*$  and apparent relaxation time ( $\tau_a$ ) of S6PS-93k/C<sub>60</sub> composites versus the concentration of C<sub>60</sub>; (c)  $\eta_0$ ,  $\eta_{0.05}^*$  and plateau modulus ( $G_N^0$ ) of S6PS-93k/C<sub>60</sub> composites versus the concentration of C<sub>60</sub> (Testing temperature: 150 °C).

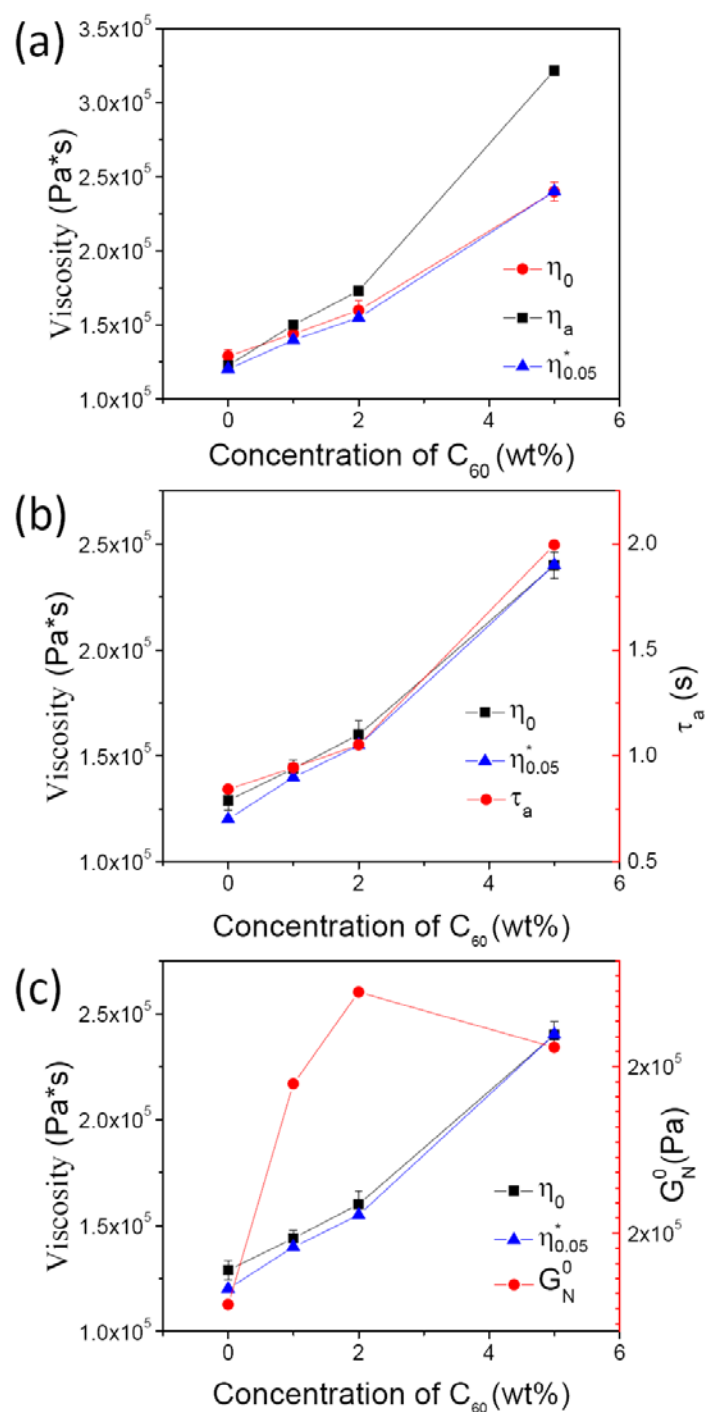

**Figure S14.** (a) Zero shear viscosity ( $\eta_0$ ), complex viscosity at 0.05 rad/s ( $\eta_{0.05}^*$ ) and apparent viscosity ( $\eta_a = G_N^0 \cdot \tau_a$ ) of S3PS-119k/C<sub>60</sub> composites versus the concentration of C<sub>60</sub>; (b)  $\eta_0$ ,  $\eta_{0.05}^*$  and apparent relaxation time ( $\tau_a$ ) of S3PS-119k/C<sub>60</sub> composites versus the concentration of C<sub>60</sub>; (c)  $\eta_0$ ,  $\eta_{0.05}^*$  and plateau modulus ( $G_N^0$ ) of S3PS-119k/C<sub>60</sub> composites versus the concentration of C<sub>60</sub> (Testing temperature: 150 °C).



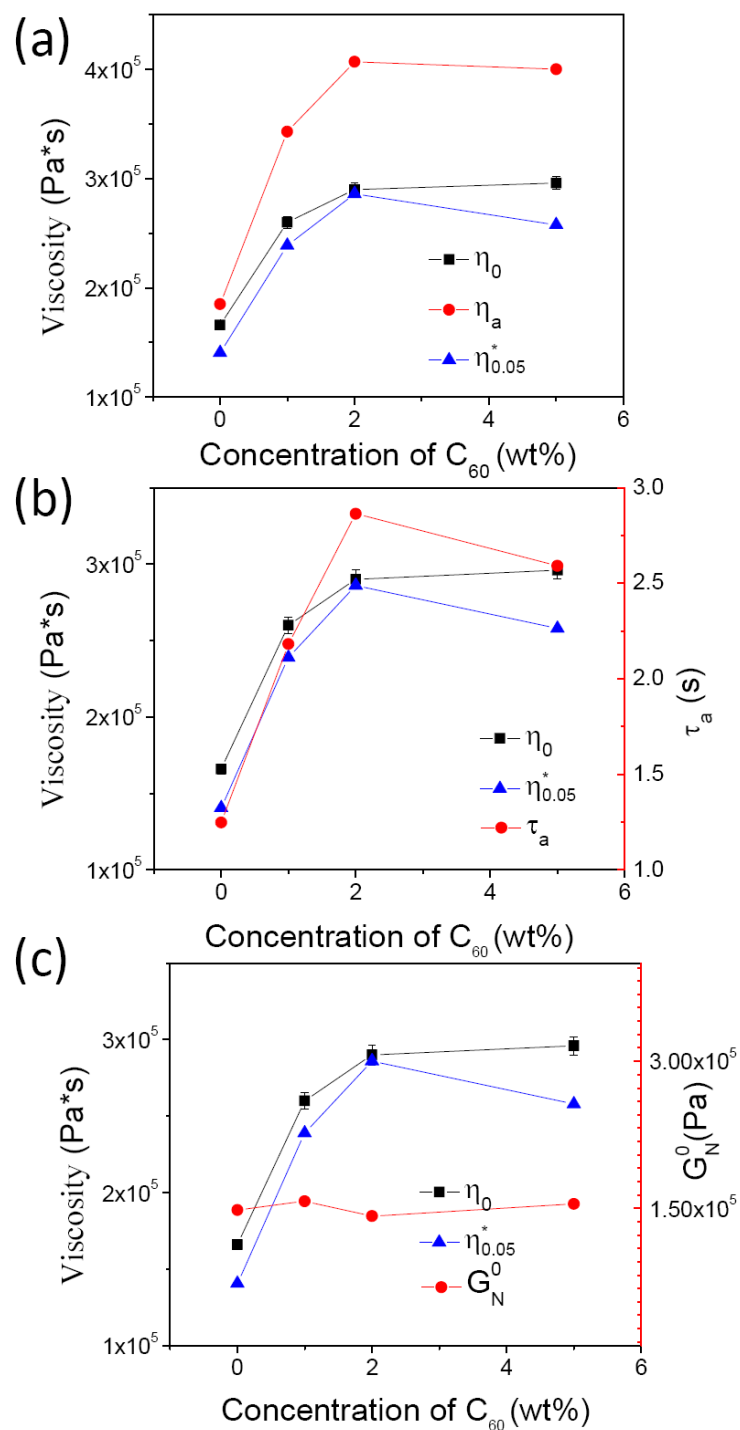

**Figure S15.** (a) Zero shear viscosity ( $\eta_0$ ), complex viscosity at 0.05 rad/s ( $\eta_{0.05}^*$ ) and apparent viscosity ( $\eta_a = G_N^0 \cdot \tau_a$ ) of S3PS-150k/C<sub>60</sub> composites versus the concentration of C<sub>60</sub>; (b)  $\eta_0$ ,  $\eta_{0.05}^*$  and apparent relaxation time ( $\tau_a$ ) of S3PS-150k/C<sub>60</sub> composites versus the concentration of C<sub>60</sub>; (c)  $\eta_0$ ,  $\eta_{0.05}^*$  and plateau modulus ( $G_N^0$ ) of S3PS-150k/C<sub>60</sub> composites versus the concentration of C<sub>60</sub> (Testing temperature: 150 °C).

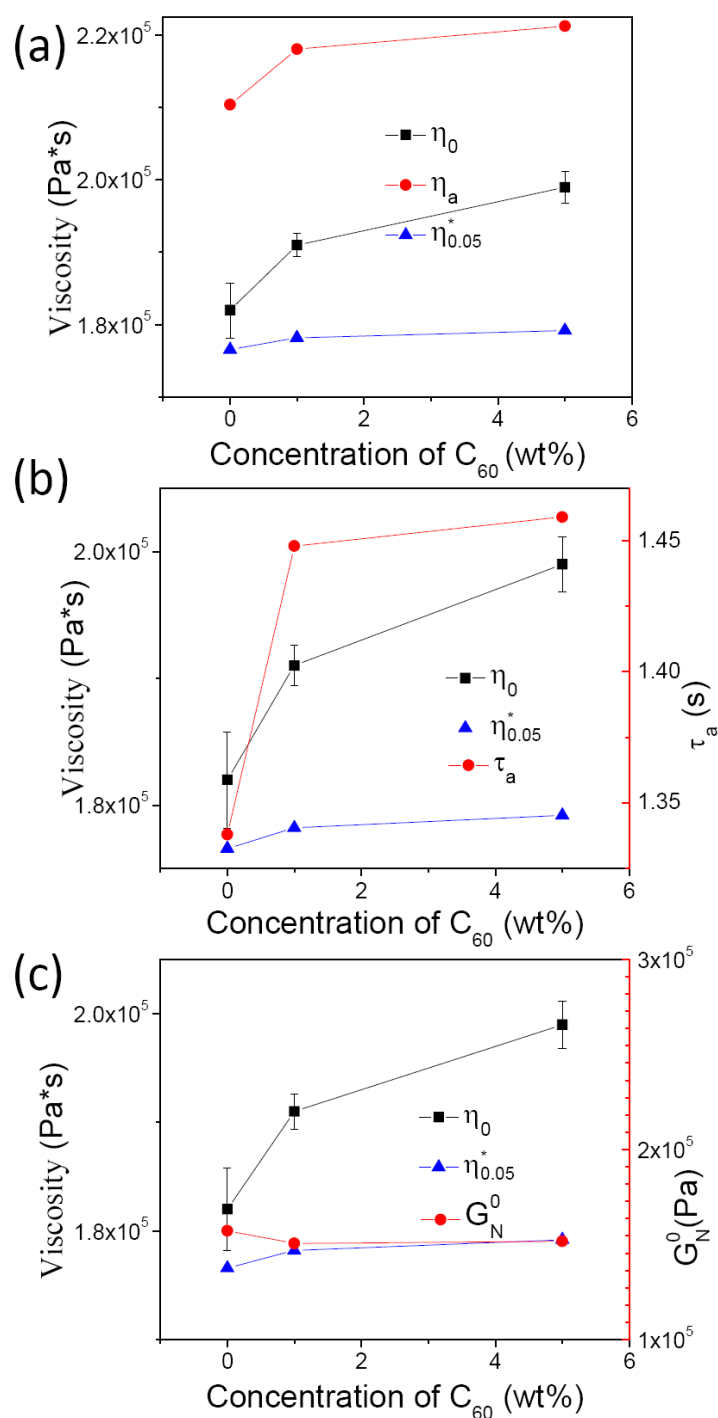

**Figure S16.** (a) Zero shear viscosity ( $\eta_0$ ), complex viscosity at 0.05 rad/s ( $\eta_{0.05}^*$ ) and apparent viscosity ( $\eta_a = G_N^0 \cdot \tau_a$ ) of S6PS-226k/C<sub>60</sub> composites versus the concentration of C<sub>60</sub>; (b)  $\eta_0$ ,  $\eta_{0.05}^*$  and apparent relaxation time ( $\tau_a$ ) of S6PS-226k/C<sub>60</sub> composites versus the concentration of C<sub>60</sub>; (c)  $\eta_0$ ,  $\eta_{0.05}^*$  and plateau modulus ( $G_N^0$ ) of S6PS-226k/C<sub>60</sub> composites versus the concentration of C<sub>60</sub> (Testing temperature: 150 °C).

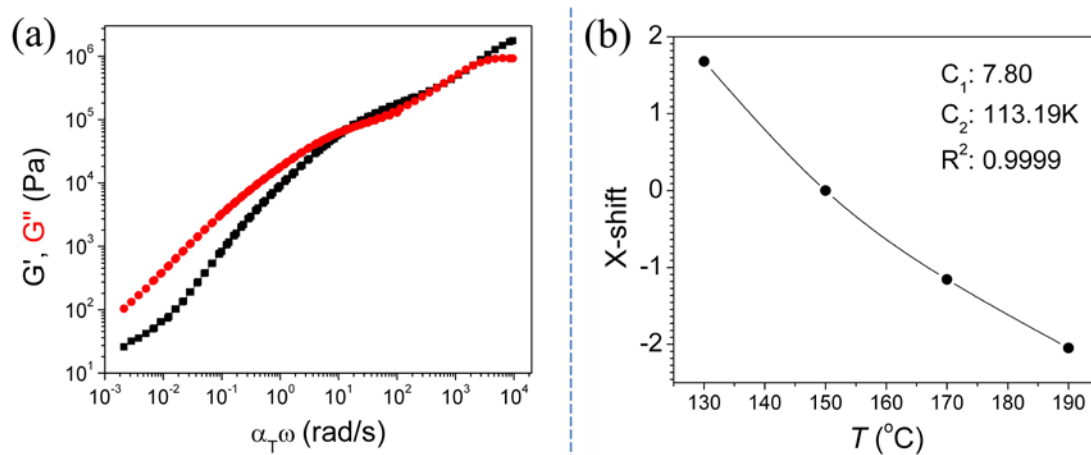

**Figure 17.** (a) Storage modulus ( $G'$ ) and loss modulus ( $G''$ ) versus frequency at 150 °C. (b) Shift factor versus temperature and the calculated  $C_1$  and  $C_2$  values at 150 °C.

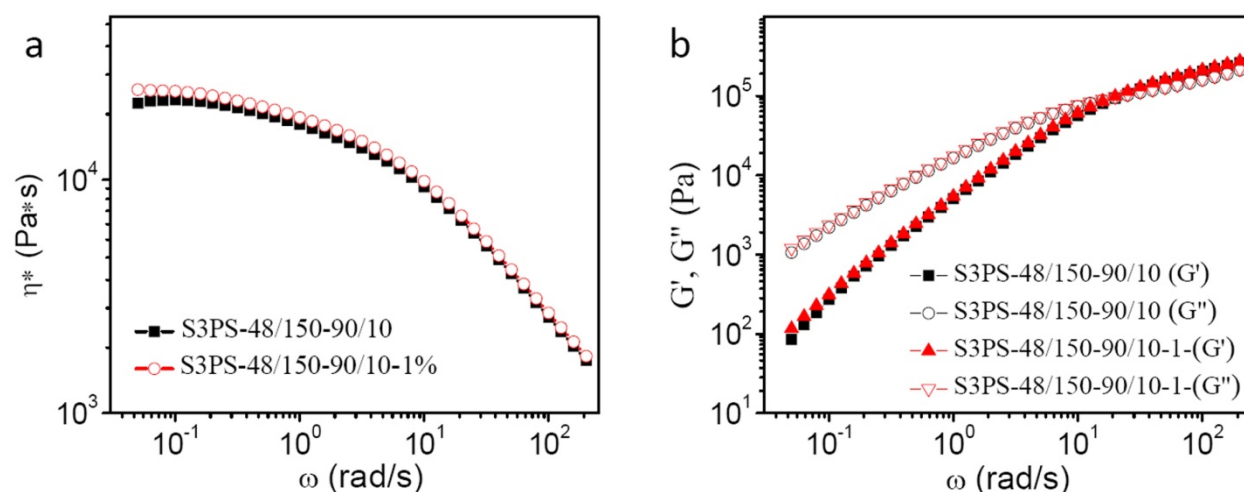

**Figure S18.** Complex viscosity ( $\eta^*$ ), storage ( $G'$ ) and loss ( $G''$ ) moduli versus frequency ( $\omega$ ) for S3PS-48k/S3PS-150k blend with 1 wt%  $C_{60}$ . Weight fraction of S3PS-150k was 10%.

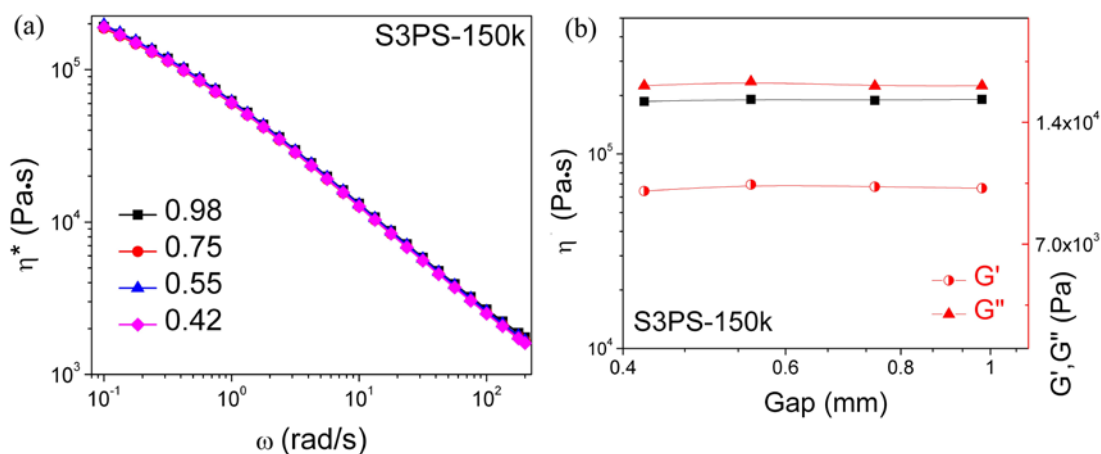

**Figure R19.** (a) Complex viscosity versus frequency at different gaps at 150 °C; (b) Comparison of complex viscosity, storage modulus and loss modulus versus gaps at 0.1 rad/s at 150 °C.

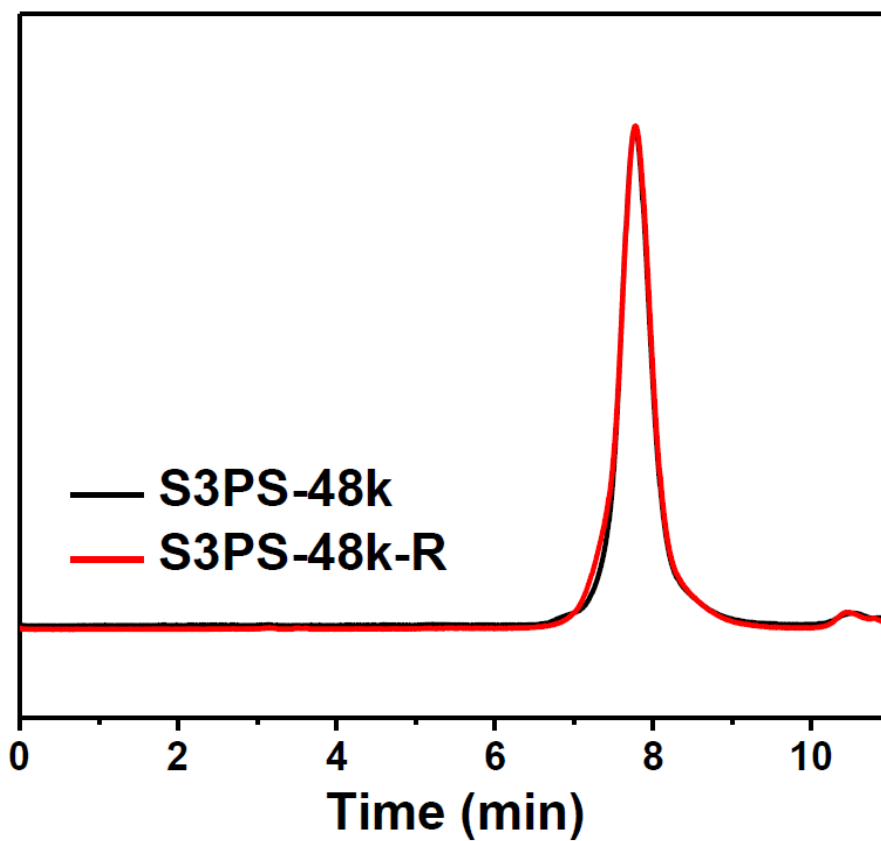

**Figure S20.** Elution curves of S3PS-48k from SEC measurement. The symbol ‘R’ represents the sample suffering rheological test.

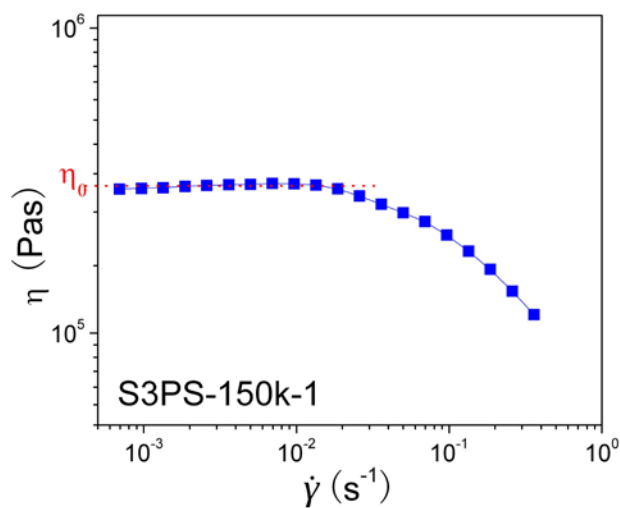

**Figure S21.** Steady-state viscosities for S3PS-150k-1 at 150 °C as an example to show how the zero shear viscosity ( $\eta_0$ ) was determined.
